# Supplementary material for: Help-seeking behaviour for pelvic floor dysfunction in women over 55: drivers and barriers
Source: Springer Nature journal article supplement (doi:10.1007/s00192-018-3618-2), 2018-03-19
Supplement: MOESM1 [file 15545768]

PELVIC FLOOR QUESTIONNAIRE

Thank you for participating in our survey. Consider your experiences in the last month and please tick the appropriate box and complete all questions

- **I have read and understood the details of this study and agree to participate (please tick)**

Bladder section

**1. How many times do you pass urine in the day**?

- up to 7
- between 8–10
- between 11–15
- more than 15

**2. How many times do you get up at night to pass urine?**

- 0–1
- 2
- 3
- More than 3 times

**3. Do you wet the bed before you wake up?**

- never
- occasionally (less than once per week)
- frequently (once or more per week)
- always (every night)

**4. Do you need to rush or hurry to pass urine when you get the urge?**

- can hold on
- occasionally (less than once a week)
- frequently (once or more per week)
- daily

**5. Does urine leak when you rush or hurry to the toilet or can’t you make it in time**?

- not at all
- occasionally (less than once a week)
- frequently (once or more per week)
- daily

**6. Do you leak urine with coughing, sneezing, laughing or exercising?**

- not at all
- occasionally (less than once a week)
- frequently (once or more per week)
- daily

**7. Is your urinary stream (urine flow) weak, prolonged or slow**?

- never
- occasionally (less than once a week)
- frequently (more than once a week)
- daily

**8. Do you have a feeling of incomplete bladder emptying?**

- never
- occasionally (less than once a week)
- frequently (once or more per week)
- daily

**9. Do you need to strain to empty your bladder?**

- never
- occasionally (less than once a week)
- frequently (once or more per week)
- daily

**10. Do you have to wear pads because of urinary leakage?**

- none —never
- as a precaution
- with exercise/during a cold
- daily

**11. Do you limit your fluid intake to decrease leakage**?

- never
- before going out/socially
- moderately
- daily

**12. Do you have frequent bladder infections?**

- no
- 1–3 per year
- 4–12 per year
- more than one per month

**13. Do you have pain in your bladder or urethra when you empty your bladder**?

- never
- occasionally (less than once per week)
- frequently (once or more per week)
- daily

**14. Does urine leakage affect your routine activities like recreation, socializing, sleeping, shopping**

**etc?**

- not at all
- slightly
- moderately
- greatly

15. **How much does your bladder problem bother you?**

- not at all
- slightly
- moderately
- greatly

***Score ____ / 45 (for office use only)***

Bowel Section

**16. How often do you usually open your bowels?**

- daily or every second day
- less than every three days
- less than once a week
- more than once a day

**17. How is the consistency of your usual stool?**

- soft
- firm
- hard (pebbles)
- watery
- variable

**18. Do you have to strain a lot to empty your bowels**?

- never
- occasionally (less than once per week)
- frequently (once or more per week)
- daily

**19. Do you use laxatives to empty your bowels?**

- never
- occasionally (less than once per week)
- frequently (once or more per week)
- daily

**20.** **Do you feel constipated?**

- never
- occasionally (less than once per week)
- frequently (once or more per week)
- daily

**21. When you get wind or flatus, can you control it or does wind leak**?

- never
- occasionally (less than once per week)
- frequently (more than once per week)
- daily

**22. Do you get an overwhelming urgency to empty your bowels**?

- never
- occasionally (less than once per week)
- frequently (once or more per week)
- daily

**23. Do you leak watery stool when you don’t mean to?**

- never
- occasionally (less than once per week)
- frequently (once or more per week)
- daily

**24. Do you leak normal stool when you don’t mean to**?

- never
- occasionally (less than once per week)
- frequently (once or more per week)
- daily

**25. Do have the feeling of incomplete bowel emptying?**

- never
- occasionally (less than once per week)
- frequently (once or more per week)
- daily

**26. Do you use finger pressure to help empty your bowels?**

- never
- occasionally (less than once per week)
- frequent (once or more per week)
- daily

27. **How much does your bowel problem bother you?**

- no problem
- slightly
- moderately
- greatly

***Score ____ / 34 (for office use only)***

Prolapse Section

**28. Do you get a sensation of tissue protrusion or a lump or bulging in your vagina?**

- never
- occasionally (less than once a week)
- frequently (once or more per week)
- daily

**29. Do you experience vaginal pressure or heaviness or dragging**?

- never
- occasionally (less than once a week)
- frequently (once or more per week)
- daily

**30. Do you have to push back your prolapse in order to void (empty your bladder)?**

- never
- occasionally (less than once a week)
- frequently (once or more per week)
- daily

**31. Do you have to push back your prolapse to empty your bowels**?

- never
- occasionally (less than once a week)
- frequently (once or more per week)
- daily

**32. How much does your prolapse bother you**?

- no problem
- slightly
- moderately
- greatly

***Score ____ / 21 (for office use only)***

Sexual Function Section

**33. Are you sexually active?**

- no
- less than once a week
- once or more per week
- daily or most days

***If not sexually active, please answer questions 34 and 42 only***

***34.* If you are not sexually active, please tell us why:**

- do not have a partner
- I am not interested
- my partner unable
- vaginal dryness
- too painful
- embarrassed due to prolapse or incontinence
- other reasons ____________________________________________________

**35. Do you have sufficient natural vaginal lubrication during intercourse?**

- yes
- no

36. **During intercourse vaginal sensation is:**

- normal / pleasant
- minimal
- painful
- none

**37. Do you feel that your vagina is too loose or lax?**

- never
- occasionally
- frequently
- always

**38. Do you feel that your vagina is too tight?**

- never
- occasionally
- frequently
- always

**39. Do you experience pain with sexual intercourse?**

- never
- occasionally
- frequently
- always

**40. Where does the pain during intercourse occur?**

- Not applicable (no pain)
- at the entrance of the vagina
- deep inside, in the pelvis
- both at the entrance and in the pelvis

**41. Do you leak urine during sexual intercourse?**

- never
- occasionally
- frequently
- always

**42. How much do these sexual issues bother you?**

- not applicable (I do not have a problem)
- not at all
- slightly
- moderately
- greatly

**TOTAL Pelvic floor Dysfunction SCORE:_______/ 40 *(for office use only)***

Additional Questions

**43. Personal Details:**

- Age: Years
- Weight: kg
- Height: cm
- What is the highest level of education you have achieved?
  - Junior Secondary Education (Year 10)
  - Senior Secondary Education (Year 12)
  - Certificate Level
  - Advanced Diploma or Diploma
  - Bachelor Degree
  - Graduate Diploma or Certificate
  - Postgraduate Degree

**44. Please tick which symptoms you are experiencing or have experienced in the past (tick as many as appropriate)**

- Bladder
- Bowel
- Prolapse
- Sexual Dysfunction
- None (Thank you – there are no further questions for you)

**45. If you have any of the above symptoms, have you sought treatment from a health professional?**

- Yes – I have sought help and am still being treated.
- Yes – I have sought help in the past but am not currently being treated.
- No – I have never sought help. Please go to question 51

**46. For which conditions have you sought treatment from a health professional for? (tick as many as appropriate)**

- Bladder
- Bowel
- Prolapse
- Sexual Dysfunction

**47. Which health professional/s have you sought treatment from? (tick as many as appropriate)**

- Female GP
- Male GP
- Gynaecologist
- Urologist
- Urogynaecologist
- Colorectal surgeon
- Continence and Women’s Health Physiotherapist
- Other Physiotherapist
- Continence Nurse
- Other (please specify) __________________________

__________________________

**48. Which health professional/s did you feel were supportive and effective? (tick as many as appropriate)**

- Female GP
- Male GP
- Gynaecologist
- Urologist
- Urogynaecologist
- Colorectal surgeon
- Women’s Health Physiotherapist
- Other Physiotherapist
- Continence Nurse
- Other (please specify)

__________________________

**________________________**

**49. Which treatments have you been offered? (tick as many as appropriate)**

- Advice
- Medications
- Vaginal Oestrogens
- Pelvic Floor Exercises
- Bladder Training
- Support Pessary
- Dilators
- Surgery
- No treatment was offered to me
- Other (please specify)

__________________________

__________________________

**50. What prompted you to go and seek help for your condition? (tick as many as appropriate)**

- I found out that treatment was available
- My symptoms started to get worse
- It started to bother me more
- It was starting to affect my emotional well being (I was feeling depressed, angry, frightened, anxious)
- It was starting to limit my physical activities
- It was starting to limit my social activities

**51. If you haven’t sought help for any of your conditions,** **what are your reason/s? (tick as many as appropriate)**

- Not applicable (I have sought help for all my conditions)
- It does not bother me
- I thought it was a normal part of ageing
- I manage my condition successfully myself
- I did not think it was serious enough to get help
- I have been too embarrassed to get help
- I am afraid to find out if I have a serious problem
- I did not know there was any treatment available
- My appointments have to be scheduled too far ahead
- The wait is too long at the time of the appointment
- The office or clinic hours are limited
- It is too expensive to get help
- I do not have any transport to office of clinic
- I don’t have a health care professional who will see me for this condition
- My health care professional is not interested in my worries or concerns
- My healthcare professional does not take time to explain what he or she is doing, or why, or answer my questions
- For some reason I am afraid of my healthcare professional
- I don’t like to be examined and asked a lot of questions

**Thank you for your participation in our survey.**

**Your time and assistance is greatly valued.**
